# Supplementary material
Source: PubMed Central journal article supplement (PMC3103359)
Supplement: supp_M111.231647_jbc.M111.231647-1.pdf [file supp_M111.231647_jbc.M111.231647-1.pdf]

# CHARACTERIZATION OF THE N- AND C-TERMINAL SUMO INTERACTING MOTIFS OF THE SCAFFOLD PROTEIN DAXX

Eric Escobar-Cabrera, Mark Okon, Desmond K. W. Lau,  
Christopher F. Dart, Alexandre M.J.J. Bonvin, and Lawrence P. McIntosh

## SUPPLEMENTAL DATA

**Supplemental Table S1. Sample conditions used for titrations. <sup>a</sup>**

| [KCl]<br>(mM) | Labeled-species | Conc.<br>(mM) <sup>b</sup> | Unlabeled species     | Conc.<br>(mM) | Final volume added (μL) /<br>ratio <sup>15</sup> N species :unlabeled species |
|---------------|-----------------|----------------------------|-----------------------|---------------|-------------------------------------------------------------------------------|
| 0             | SUMO-1          | 0.13                       | SIM-N                 | 3.0           | 32 / 1 : 1.5                                                                  |
| 100           | SUMO-1          | 0.15                       | DAXX <sup>1-144</sup> | 2.1           | 292 / 1 : 8.3                                                                 |
| 0             | SUMO-2          | 0.10                       | SIM-N                 | 3.0           | 27 / 1 : 1.6                                                                  |
| 100           | SIM-N           | 0.12                       | SUMO-1                | 2.5           | 130 / 1 : 5.5                                                                 |
| 100           | SIM-N           | 0.12                       | SUMO-2                | 2.5           | 130 / 1 : 5.5                                                                 |
| 200           | SIM-N           | 0.09                       | SUMO-1                | 2.3           | 112 / 1 : 5.8                                                                 |
| 200           | SIM-N           | 0.14                       | SUMO-2                | 8.7           | 120 / 1 : 15.5                                                                |
| 0             | SIM-C           | 0.11                       | SUMO-1                | 1.7           | 142 / 1 : 4.4                                                                 |
| 0             | SIM-C           | 0.11                       | SUMO-2                | 1.7           | 142 / 1 : 4.4                                                                 |
| 100           | SIM-C           | 0.13                       | SUMO-1                | 2.2           | 220 / 1 : 7.8                                                                 |
| 100           | SIM-C           | 0.13                       | SUMO-2                | 1.7           | 250 / 1 : 6.8                                                                 |
| 200           | SIM-C           | 0.09                       | SUMO-1                | 2.3           | 240 / 1 : 12                                                                  |
| 200           | SIM-C           | 0.13                       | SUMO-2                | 8.7           | 180 / 1 : 24                                                                  |

<sup>a</sup> Samples at 25 °C in an NMR buffer composed of ~5% D<sub>2</sub>O, 10 mM K<sub>2</sub>HPO<sub>4</sub>, 0.1 mM EDTA, 10 mM DTT, pH 6.5 and the indicated KCl concentration.

<sup>b</sup> Initial volume 500 μL.

**Supplemental Table S2. Intermolecular NOEs between unlabeled SIM-N and  $^{13}\text{C}/^{15}\text{N}$  labeled SUMO-1.**

| $^{13}\text{C}/^{15}\text{N}$ SUMO-1 |                                            | unlabeled SIM-N |                                                                                                            |
|--------------------------------------|--------------------------------------------|-----------------|------------------------------------------------------------------------------------------------------------|
| I34                                  | $\text{H}^{\gamma 2}$                      | I8              | $\text{H}^{\alpha}, \text{H}^{\gamma 2}, \text{H}^{\delta 1}; \text{V9 } \text{H}^{\alpha}$                |
| H35                                  | $\text{H}^{\text{N}}$                      | I8              | $\text{H}^{\alpha}, \text{H}^{\gamma 2}$                                                                   |
| H35                                  | $\text{H}^{\beta 1}, \text{H}^{\beta 2}$   | I8              | $\text{H}^{\alpha}, \text{H}^{\gamma 2}$                                                                   |
| F36                                  | $\text{H}^{\beta 1}, \text{H}^{\beta 2}$   | L10             | $\text{H}^{\delta 2}$                                                                                      |
| F36 (or 35) aromatic                 |                                            | L10             | $\text{H}^{\beta 1}, \text{H}^{\beta 2}; \text{V9 } \text{H}^{\gamma 1,2}; \text{I8 } \text{H}^{\delta 1}$ |
| K37                                  | $\text{H}^{\text{N}}$                      | L10             | $\text{H}^{\alpha}, \text{H}^{\delta 2}$                                                                   |
| K37                                  | $\text{H}^{\beta 1}, \text{H}^{\beta 2}$   | V9              | $\text{H}^{\gamma(1\text{or}2)}; \text{L10 } \text{H}^{\delta 2}$                                          |
| K37                                  | $\text{H}^{\gamma 1}, \text{H}^{\gamma 2}$ | L10             | $\text{H}^{\delta 2}$                                                                                      |
| V38                                  | $\text{H}^{\delta(1\text{or}2)}$           | L10             | $\text{H}^{\delta 1}, \text{H}^{\delta 2}$                                                                 |
| V39                                  | $\text{H}^{\beta}$                         | D11             | $\text{H}^{\beta 2}$                                                                                       |
| V39                                  | $\text{H}^{\beta}$                         | L10             | $\text{H}^{\delta 1}, \text{H}^{\delta 2}$                                                                 |
| T42                                  | $\text{H}^{\gamma 2}$                      | L10             | $\text{H}^{\delta 2}; \text{D11 } \text{H}^{\beta}$                                                        |
| H43                                  | $\text{H}^{\text{N}}$                      | D11             | $\text{H}^{\alpha}, \text{H}^{\beta 2}$                                                                    |
| L47                                  | $\text{H}^{\text{N}}$                      | L10             | $\text{H}^{\delta 1}, \text{H}^{\delta 2}$                                                                 |
| L47                                  | $\text{H}^{\alpha}$                        | L10             | $\text{H}^{\delta 1}, \text{H}^{\delta 2}$                                                                 |
| L47                                  | $\text{H}^{\delta 1}$                      | L10             | $\text{H}^{\delta 2}$                                                                                      |
| S50                                  | $\text{H}^{\text{N}}$                      | L10             | $\text{H}^{\delta 1}, \text{H}^{\delta 2}$                                                                 |
| R54                                  | $\text{H}^{\beta 1}$                       | I8              | $\text{H}^{\delta 1}$                                                                                      |
| R54                                  | $\text{H}^{\beta 2}$                       | I7 or I8        | $\text{H}^{\gamma 2}$                                                                                      |
| R54                                  | $\text{H}^{\delta 1}$                      | I8              | $\text{H}^{\delta 1}$                                                                                      |

**Supplemental Table S3. Statistics for HADDOCK structure calculations.**

|                                                       | <b>SIM-N/DHB<sup>a</sup></b> | <b>SIM-N/SUMO-1</b> | <b>SIM-C/SUMO-1<br/>3 body<sup>b</sup></b> | <b>SIM-C/SUMO-1<br/>2 body<sup>c</sup></b> |
|-------------------------------------------------------|------------------------------|---------------------|--------------------------------------------|--------------------------------------------|
| <b>Number of clusters</b>                             | 15                           | 2                   | 4                                          | 1                                          |
| Cluster rank                                          | 1                            | 1                   | 1                                          | 1                                          |
| Cluster population                                    | 5                            | 190                 | 166                                        | 198                                        |
| RMSD from overall lowest-energy structure (Å)         | 2.2 ± 1.5                    | 2.8 ± 1.7           | 2.1 ± 1.3                                  | 0.9 ± 0.5                                  |
| HADDOCK score (a.u.)                                  | -127.8 ± 17.4                | -104.7 ± 3.9        | -139.4 ± 4.1                               | 99.5 ± 9.9                                 |
| van der Waals energy (kcal mol <sup>-1</sup> )        | -58.4 ± 9.3                  | -51.1 ± 10.5        | -52.4 ± 13.3                               | -32.2 ± 3.3                                |
| Electrostatic energy (kcal mol <sup>-1</sup> )        | -563.0 ± 90.3                | -371.7 ± 25.8       | -652.4 ± 106.7                             | -257.5 ± 19.2                              |
| Desolvation energy (kcal mol <sup>-1</sup> )          | 30.0 ± 7.2                   | 16.1 ± 2.4          | 35.5 ± 9.0                                 | 18.3 ± 7.4                                 |
| Restraints violation energy (kcal mol <sup>-1</sup> ) | 132.3 ± 40.8                 | 46.2 ± 14.2         | 8.0 ± 5.8                                  | 165.0 ± 11.9                               |
| Buried surface area (Å <sup>2</sup> )                 | 1868 ± 169                   | 1276 ± 69           | 2584 ± 126                                 | 1069 ± 42                                  |

<sup>a</sup> Only ambiguous interaction restraints were used.

<sup>b</sup> Ensemble averaged three body docking with two copies of the SIM-C peptide. The PRE restraints were calculated as ensemble average over the two peptides. In each resulting complex, one peptide bound in the parallel mode and the other antiparallel.

<sup>c</sup> Regular two body docking with only one copy of the SUMO-1 peptide. Only the parallel binding orientation was observed. Note the high restraint energy compared to the ensemble averaged docking run.

**Supplemental Table S4. Summary of reported dissociation constants of SIM/SUMO complexes.**<sup>a</sup>

| <b>SUMO paralog</b> | <b>SIM<sup>b</sup></b> | <b>K<sub>D</sub> (μM)</b> | <b>Buffer</b>                                 | <b>Reference</b> |
|---------------------|------------------------|---------------------------|-----------------------------------------------|------------------|
| <b>SUMO-1</b>       | PIASX-Pa               | 7                         | 20 mM Tris, pH 7.6, 30 °C                     | (1)              |
| <b>SUMO-1</b>       | PIASX-N                | 9                         | 20 mM Tris, pH 7.6, 30 °C                     | (1)              |
| <b>SUMO-3</b>       | PIASX-N                | 5                         | 20 mM Tris, pH 7.6, 30 °C                     | (1)              |
| <b>SUMO-1</b>       | PIASX-Pb               | 6                         | 20 mM phosphate, pH 7.4, 30 °C                | (2)              |
| <b>SUMO-1</b>       | MCAF1                  | 14                        | 20 mM phosphate, pH 6.8, 25 °C                | (3)              |
| <b>SUMO-1</b>       | MCAF1                  | 12 <sup>c</sup>           | 20 mM phosphate, pH 6.8, 25 °C<br>150 mM NaCl | (3)              |
| <b>SUMO-1</b>       | MCAF1                  | 8 <sup>c</sup>            | 20 mM phosphate, pH 6.8, 25 °C<br>300 mM NaCl | (3)              |
| <b>SUMO-3</b>       | MCAF1                  | 1.3                       | 20 mM phosphate, pH 6.8, 25 °C                | (3)              |
| <b>SUMO-3</b>       | MCAF1                  | 1.1 <sup>c</sup>          | 20 mM phosphate, pH 6.8, 25 °C<br>150 mM NaCl | (3)              |
| <b>SUMO-3</b>       | MCAF1                  | N.D. <sup>d</sup>         | 20 mM phosphate, pH 6.8, 25 °C<br>300 mM NaCl | (3)              |

<sup>a</sup> All reported dissociation constants were measured with ITC.

<sup>b</sup> **PIASX-Pa:** KVDVIDLTIESSSDEEEEDPPAKR;

**PIASX-N:** VDVIDLTIE;

**PIASX-Pb:** KVDVIDLTIE

**MCAF-1:** GVIDLTMDDEE

<sup>c</sup> Noisy binding curve.

<sup>d</sup> Not determined due to no significant heat release.



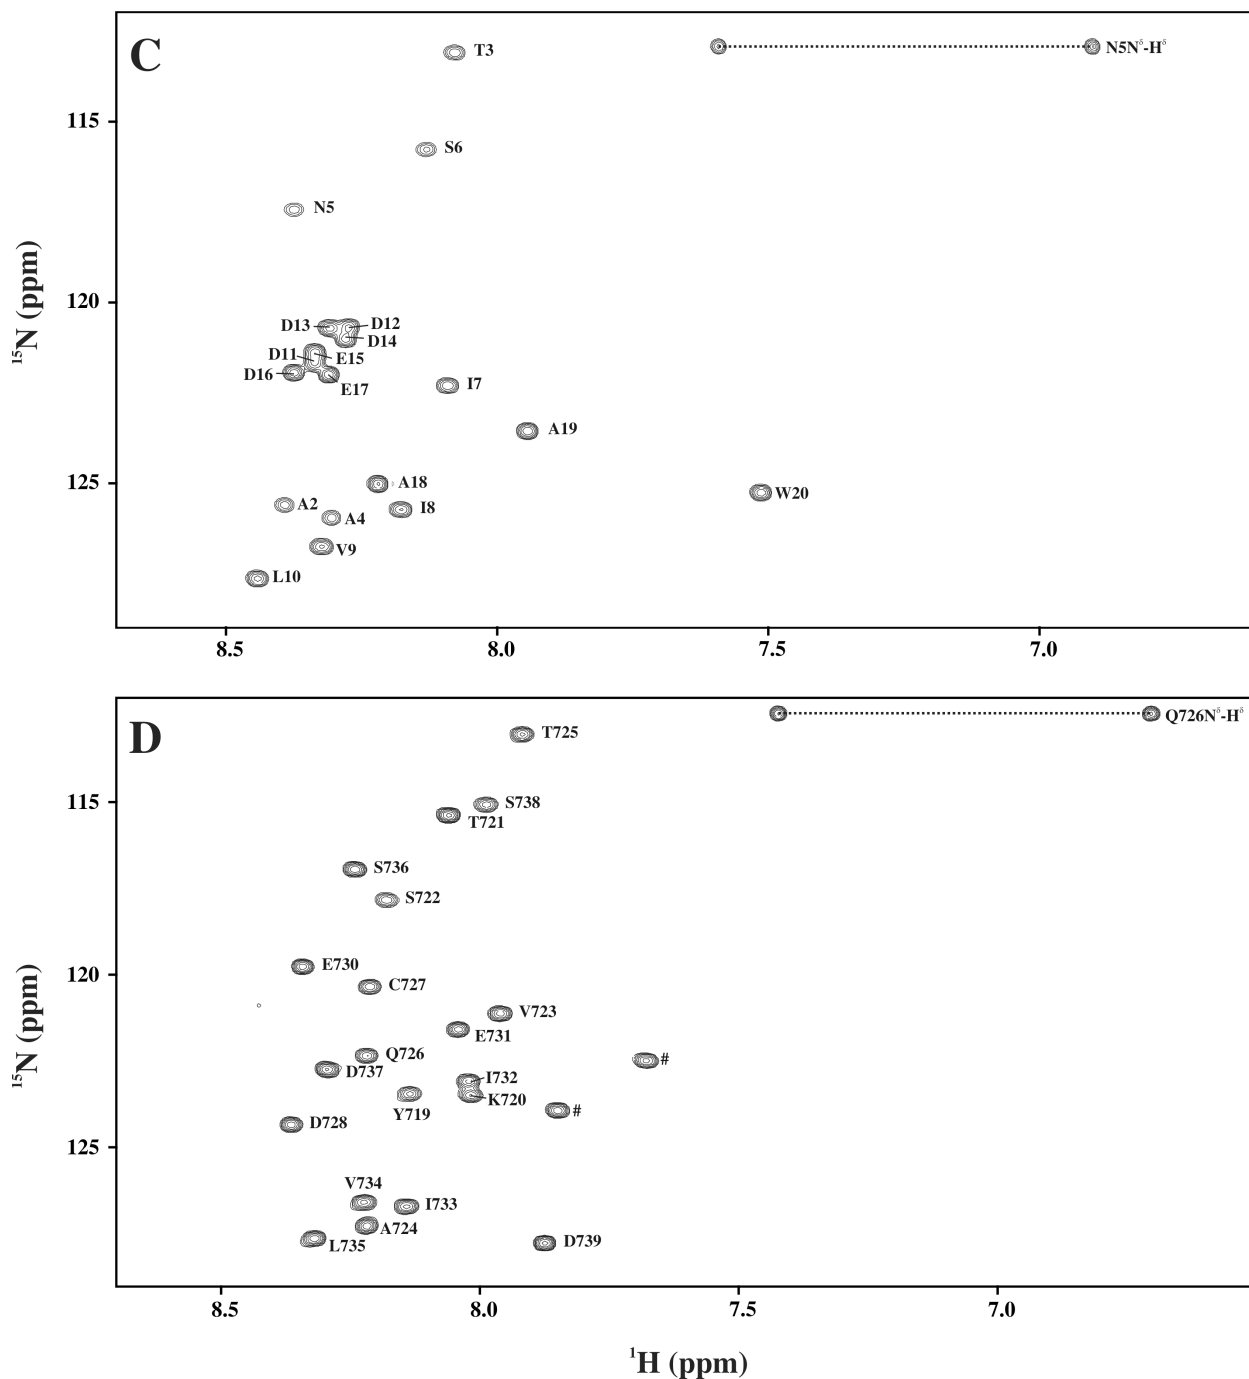

**Supplemental Figure S1.** Annotated  $^1\text{H}$ - $^{15}\text{N}$  HSQC spectra of (A) SUMO-1 (155  $\mu\text{M}$ , 17  $^\circ\text{C}$ ), (B) SUMO-2 (1.1 mM, 25  $^\circ\text{C}$ ), (C) SIM-N (120  $\mu\text{M}$ , 25  $^\circ\text{C}$ ), and (D) SIM-C (125  $\mu\text{M}$ , 25  $^\circ\text{C}$ ). All samples were in common buffer (10 mM phosphate, 100 mM KCl, 0.1 mM EDTA, pH 6.5). The signals from Asn and Gln side-chain  $^{15}\text{NH}_2$  groups are connected by horizontal lines. Aliased peaks are shown in red. Peaks in (D) marked as # correspond to either W718 or I719.

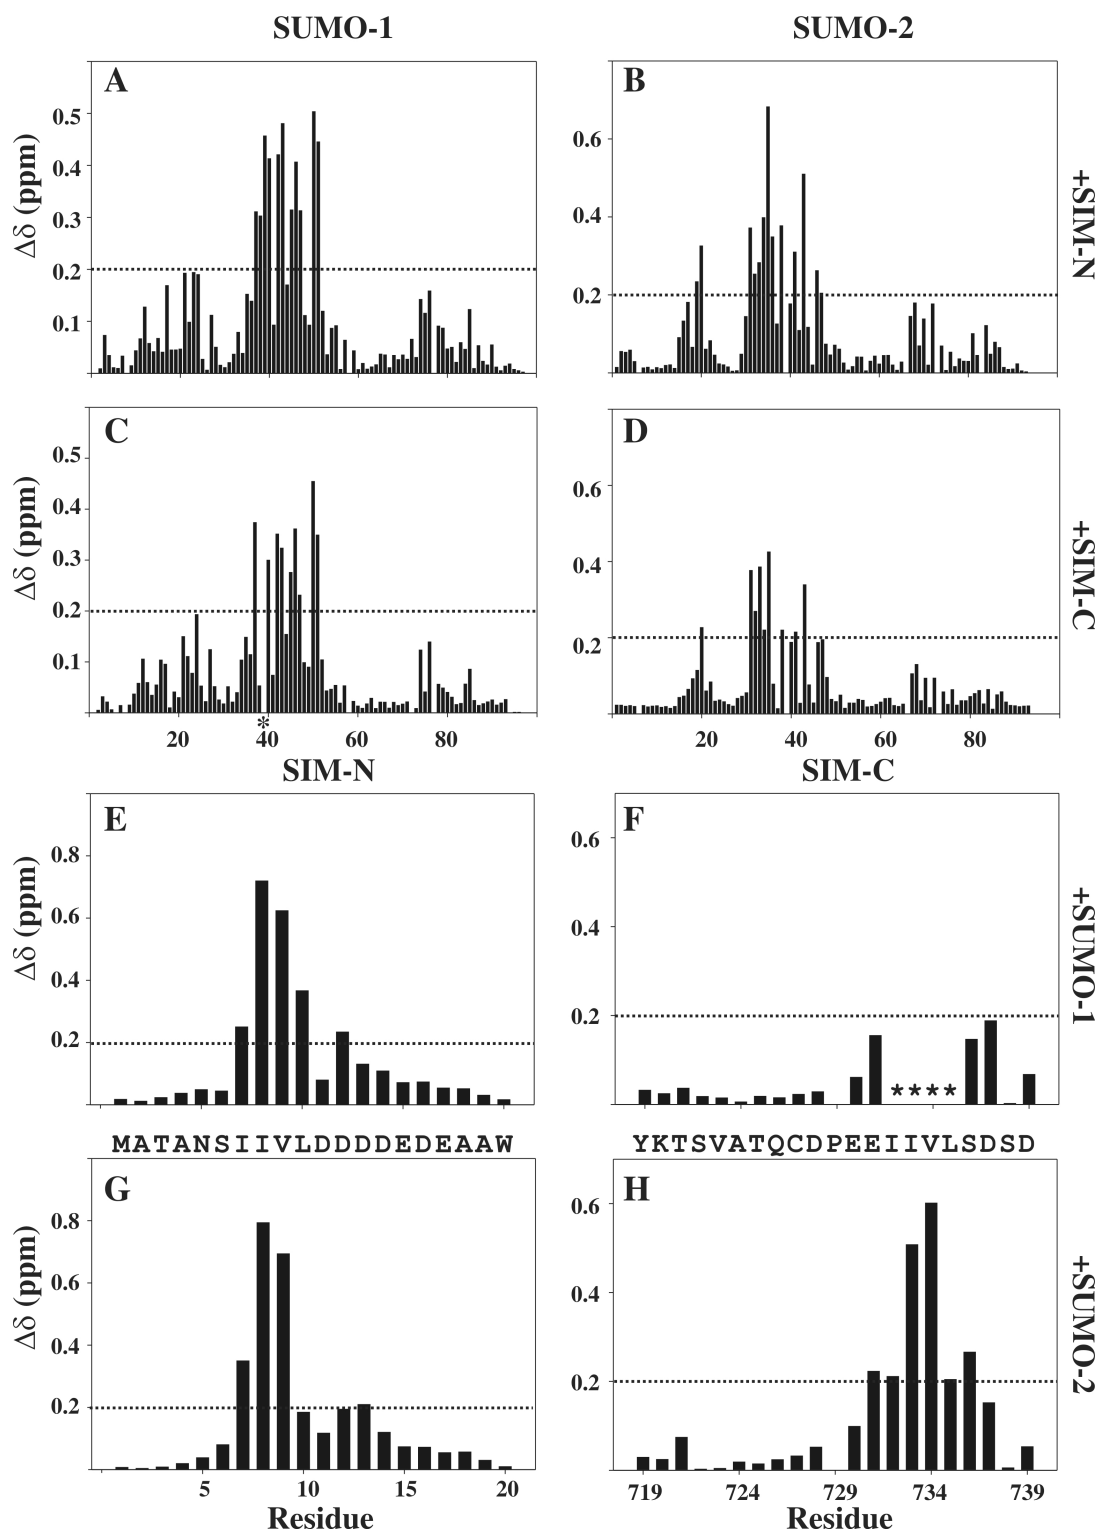

**Supplemental Figure S2.** Mapping the binding interfaces of SUMO-1 and SUMO-2 with SIM-N and SIM-C. Amide chemical shift perturbations of (A,C) SUMO-1 and (B,D) SUMO-2 upon binding (A,B) SIM-N and (C,D) SIM-C. Also shown are (E,G) SIM-N and (F,H) SIM-C amide chemical shift changes upon binding (E,F) SUMO-1 and (G,H) SUMO-2. The signals of

residues marked as \* were broadened beyond detection in the complex. All samples were in 10 mM potassium phosphate, 0.1 mM EDTA, 5 mM DTT, pH 6.5, with 0 (A, B) or 100 mM KCl (C-H) at 25 °C. The dashed lines show the cut-off values for residues highlighted in Figure 3. Supplemental Table S1 summarizes the final SIM/SUMO ratios in the spectra used to obtain these chemical shift perturbation values.



<sup>15</sup>N-SIM-C

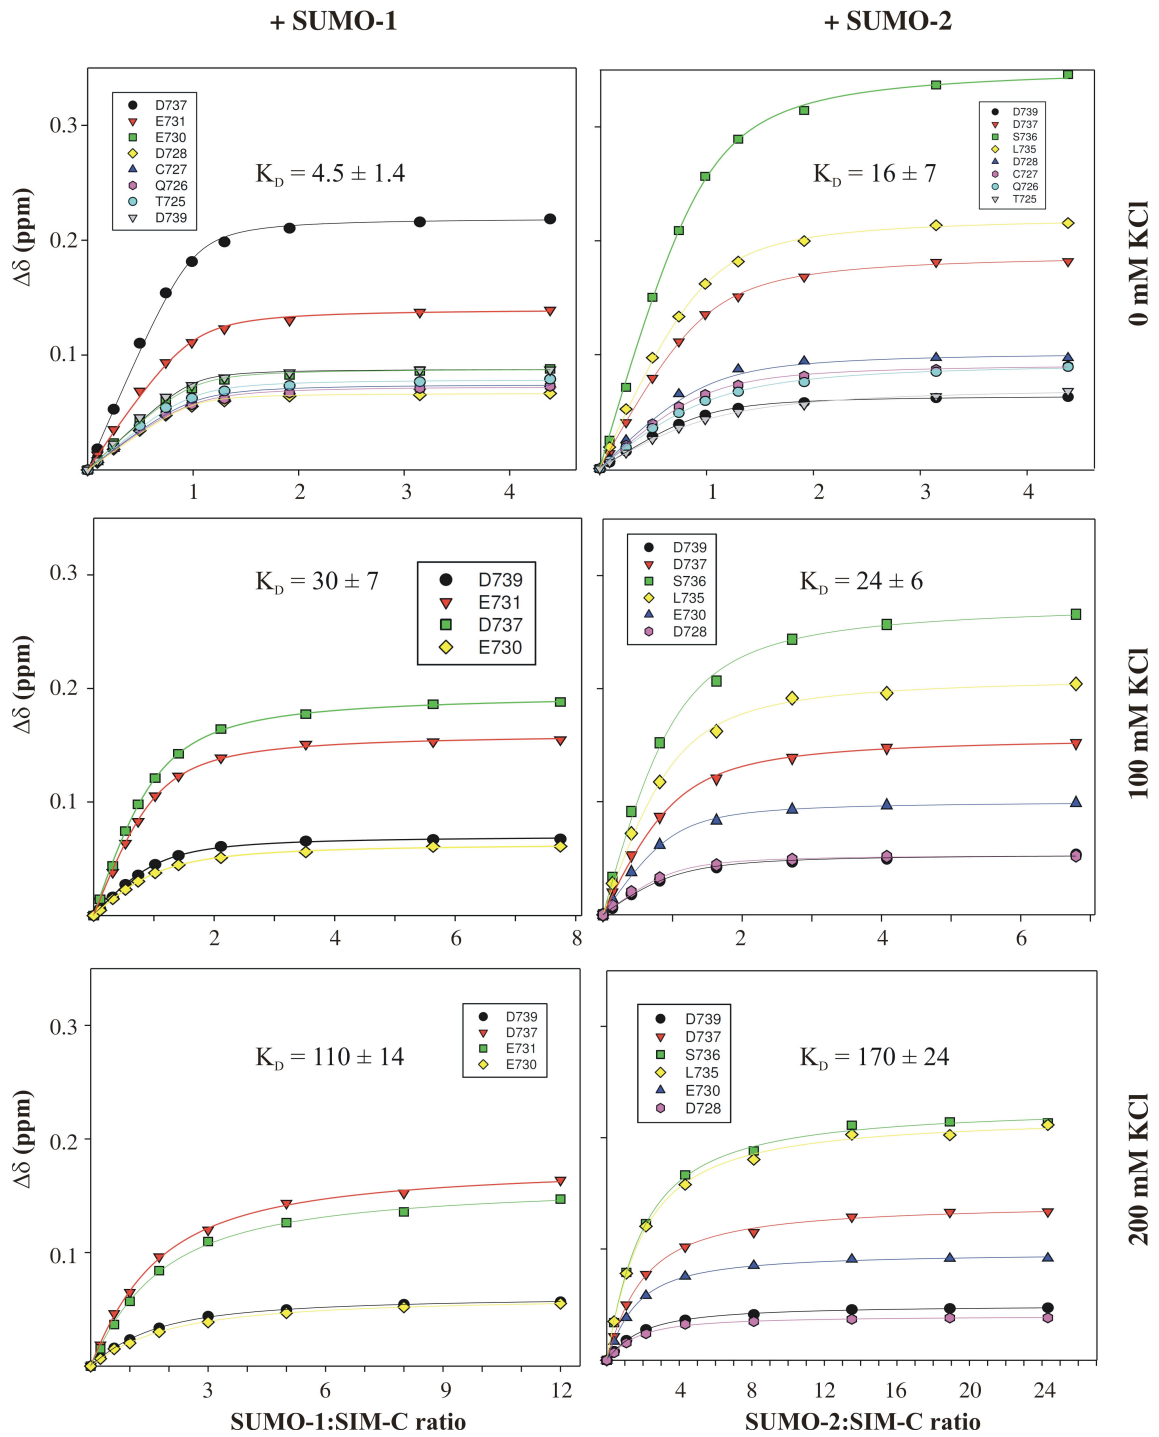

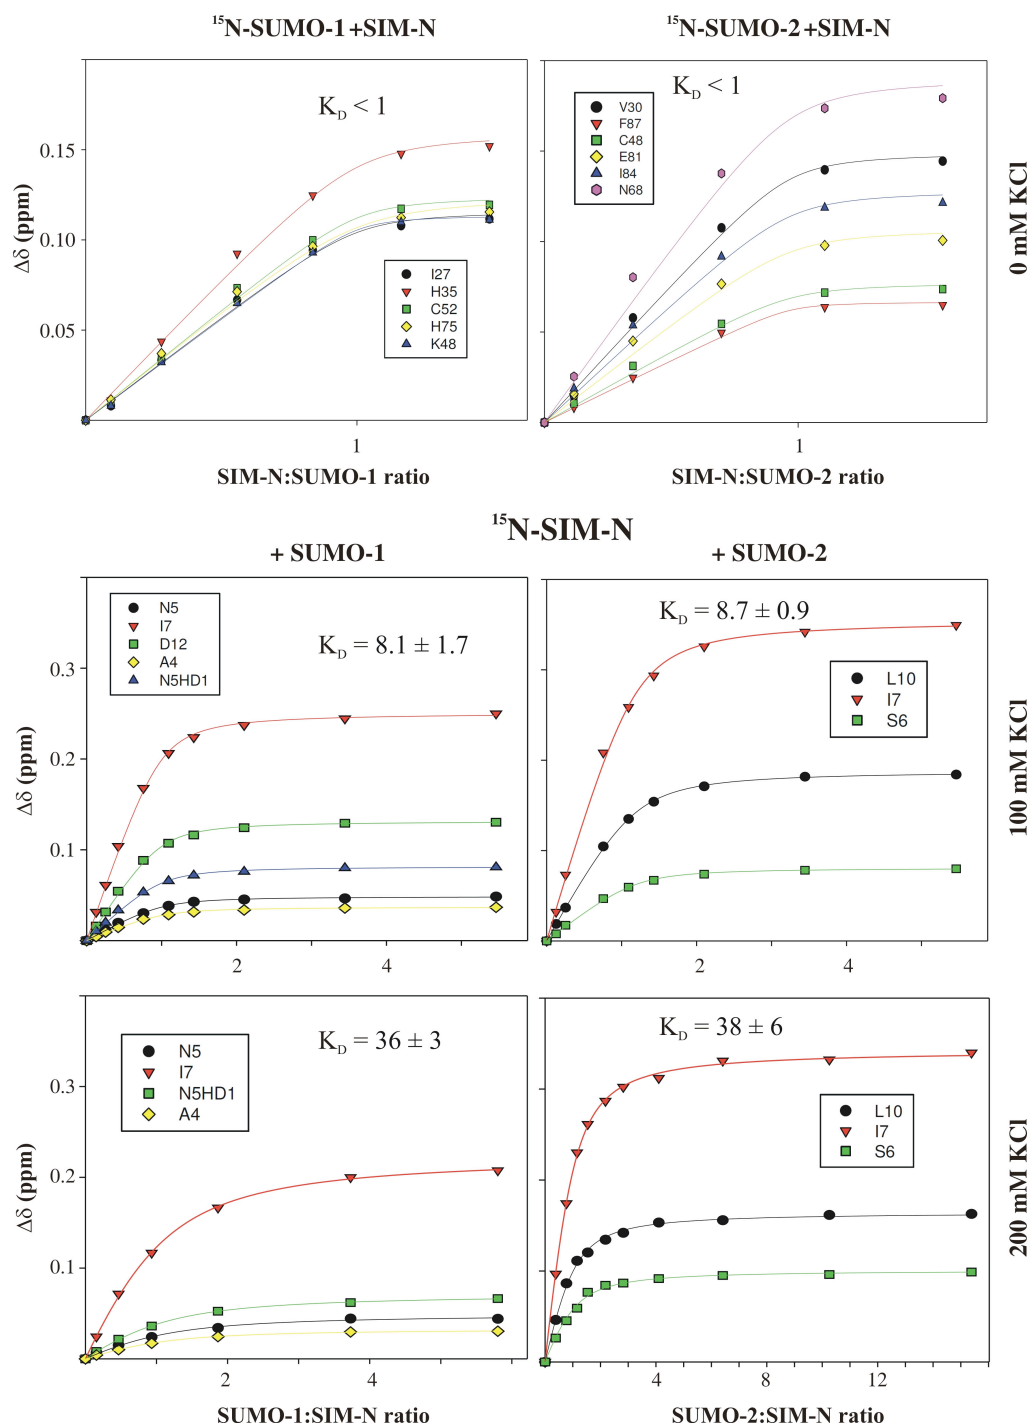

**Supplemental Figure S3.** Titration curves used to determine  $K_D$  values. The dissociation constants reported in Table 1 were derived using data from the titrations shown in Figures 1 and 2. The regressions were calculated using the equation for formation of a 1:1 complex in the fast exchange limit (4), with protein and peptide concentrations summarized in Supplemental Table S1. Average values  $\pm$  standard deviations are derived from the individual fits for the indicated residues. The plots for <sup>15</sup>N-labeled SUMO-1 and SUMO-2 with unlabelled SIM-N showed stoichiometric binding, so only an upper estimate for the  $K_D$  was obtained.

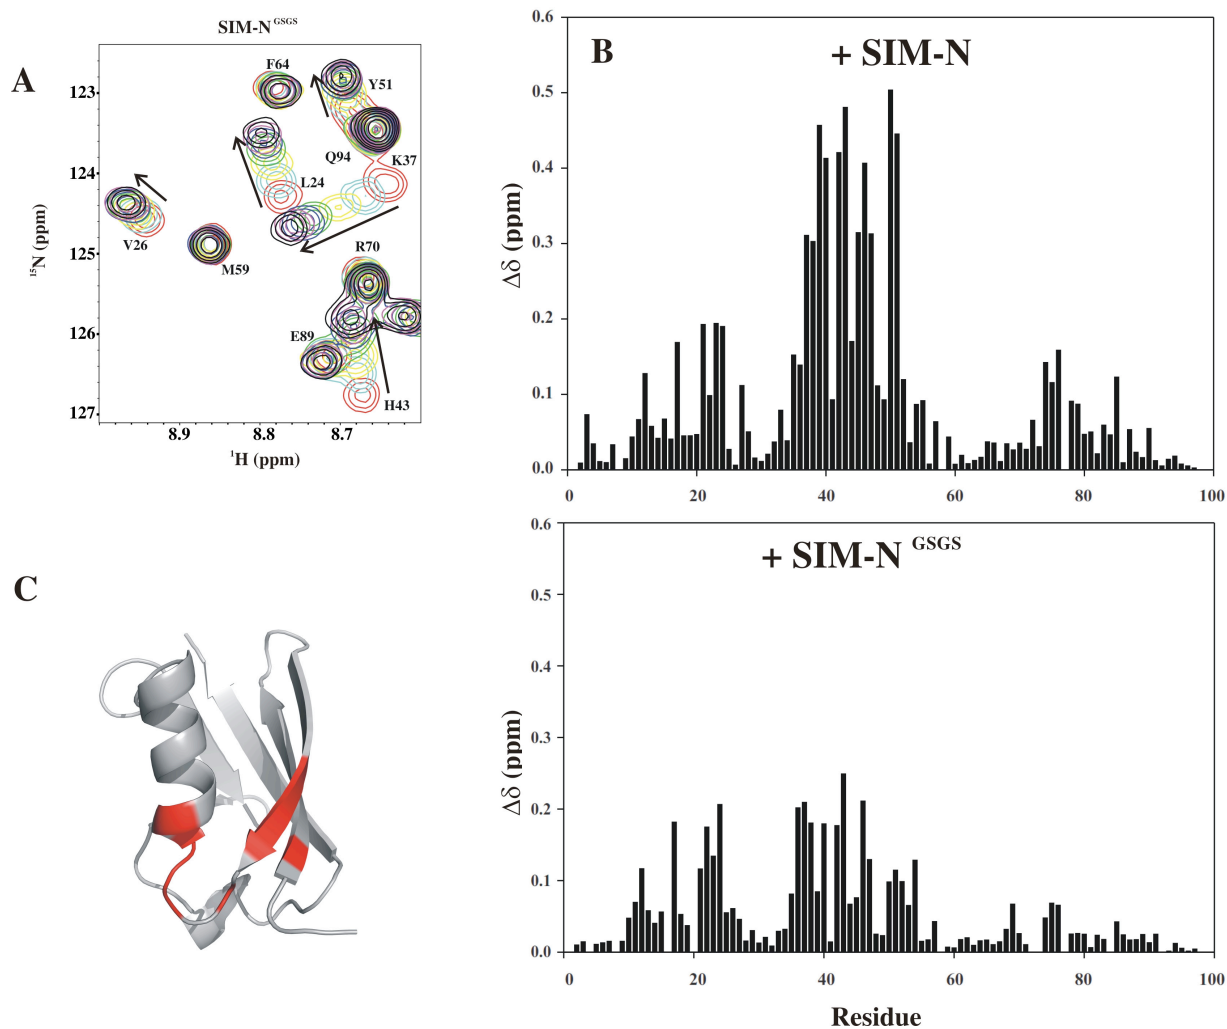

**Supplemental Figure S4.** NMR-monitored titration of SUMO-1 with SIM-N<sup>GSGS</sup> demonstrates that a SIM mutant lacking the hydrophobic core Ile-Ile-Val-Leu still weakly binds SUMO-1 between helix  $\alpha$ 1 and strand  $\beta$ 2. **(A)** Section of the overlapped <sup>15</sup>N-HSQC spectra of <sup>15</sup>N-SUMO-1 with increasing amounts of unlabeled SIM-N<sup>GSGS</sup>. Arrows show peaks shifting as the concentration of SIM-N<sup>GSGS</sup> increases from 0 (red) up to a stoichiometric ratio of 16:1 (black). **(B)** Comparison of the SUMO-1 amide chemical shift perturbations upon addition of a 1.5 molar excess of SIM-N (top) and a 16 fold excess of SIM-N<sup>GSGS</sup> (bottom). **(C)** Mapping of SUMO-1 residues showing the greatest chemical shift perturbation (< 0.12 ppm) upon binding SIM-N<sup>GSGS</sup> confirms the binding site. Fitting the titration data yielded a  $K_D = 440 \pm 30 \mu\text{M}$ .

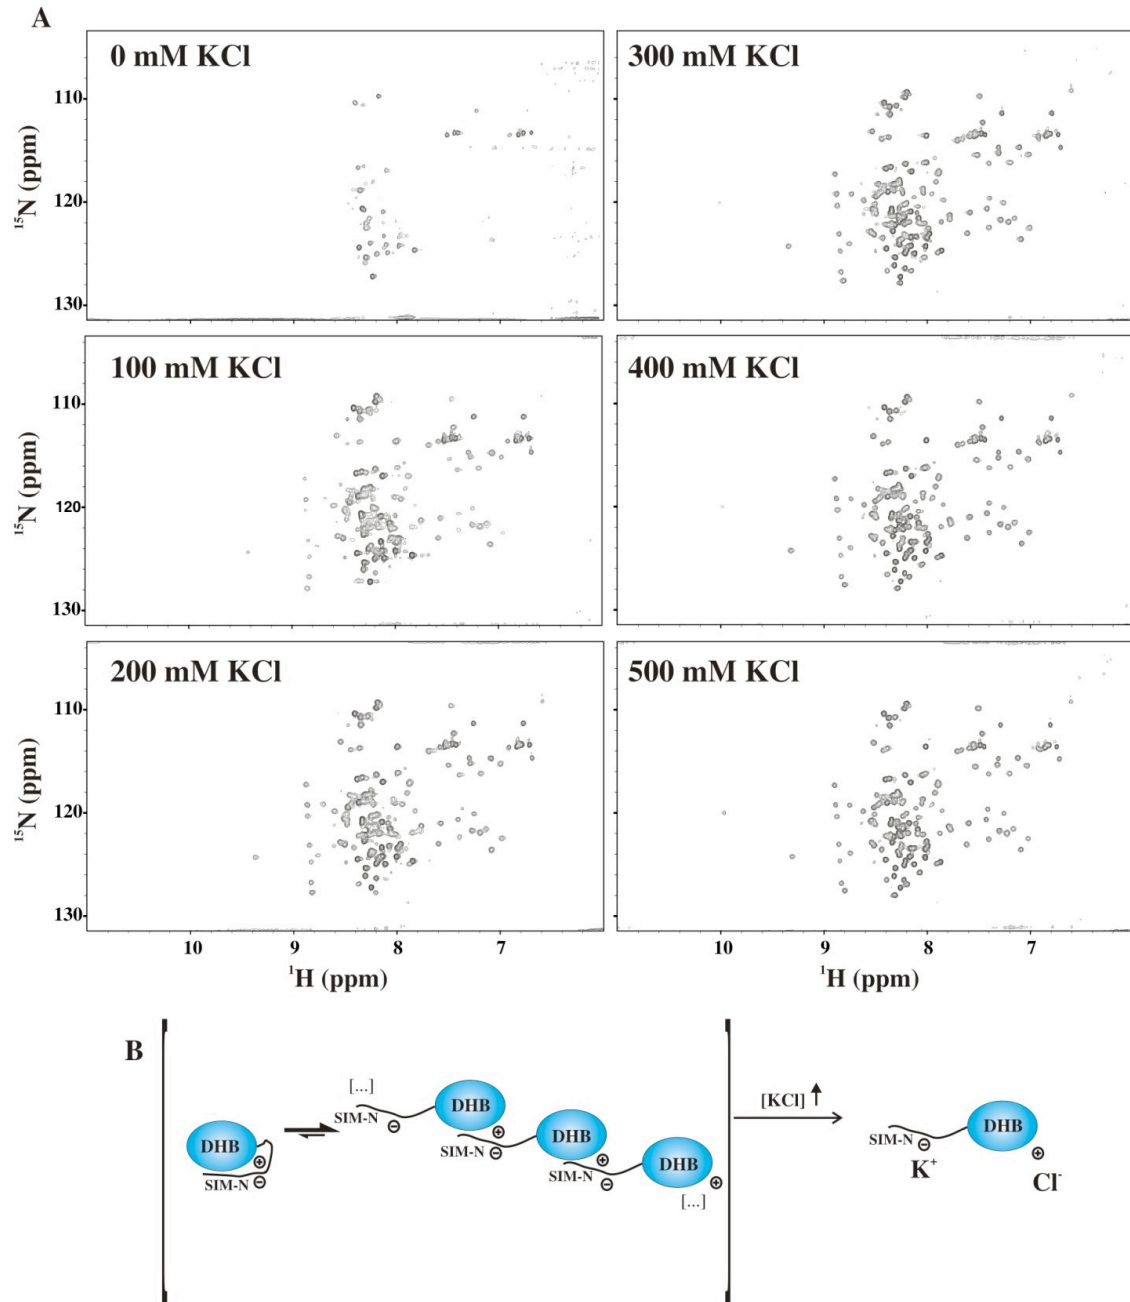

**Supplemental Figure S5.** DAXX<sup>1-144</sup> self-association is ionic strength dependent. **(A)** The <sup>15</sup>N-<sup>1</sup>H-SQC spectra of DAXX<sup>1-144</sup> showed broad and missing peaks at low ionic strength. As the KCl concentration was increased, <sup>1</sup>H<sup>N</sup>-<sup>15</sup>N peaks reappeared and became sharper. **(B)** At low ionic strength and a relatively high concentration of DAXX<sup>1-144</sup> (100 μM), intermolecular binding of the SIM-N and DHB domain to form multimers is presumably favored, whereas at high ionic strength, the monomer is favored.

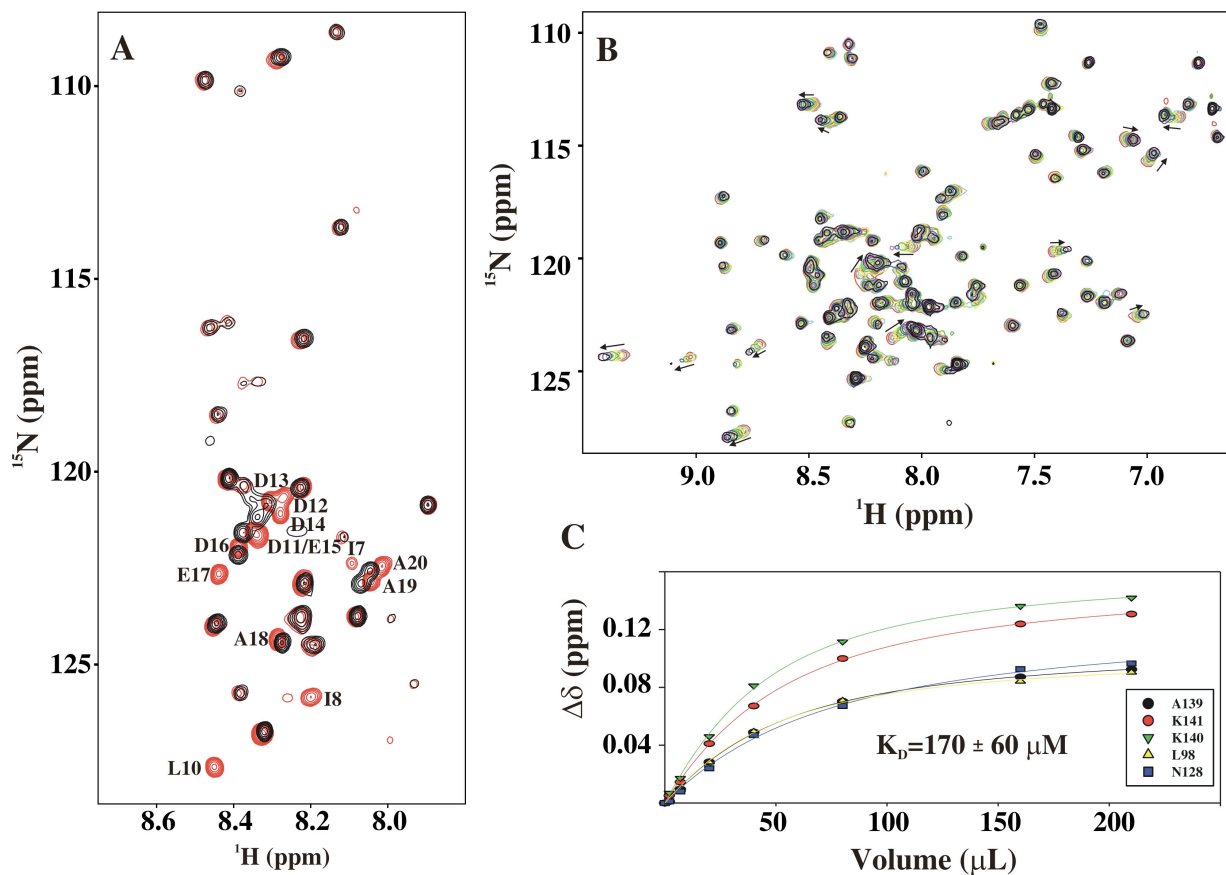

**Supplemental Figure S6.** SIM-N in DAXX<sup>1-56</sup> binds the DHB domain of DAXX<sup>55-144</sup>. (A) Superimposed  $^{15}\text{N}$ -HSQC spectra of DAXX<sup>1-56</sup> in the absence (initially 150  $\mu\text{M}$  in 500  $\mu\text{L}$ , red) and presence of unlabeled DAXX<sup>55-144</sup> (250  $\mu\text{L}$  of 1.4 mM stock added, black). The assigned residues showing the most significant changes (broadening) correspond to those of SIM-N within DAXX<sup>1-56</sup>. (B) Reciprocal titration of  $^{15}\text{N}$ -DAXX<sup>55-144</sup> (140  $\mu\text{M}$  in 500  $\mu\text{L}$ ) with progressive aliquots of unlabeled DAXX<sup>1-56</sup> confirmed binding (210  $\mu\text{L}$  of 2.2 mM stock added). Arrows indicate amide peaks undergoing chemical shift changes upon addition of DAXX<sup>1-56</sup>. (C) The dissociation constant ( $170 \pm 60 \mu\text{M}$ ) was calculated from fitting individually the chemical shift changes for the five indicated amides of  $^{15}\text{N}$ -DAXX<sup>55-144</sup>.

## SUPPLEMENTAL REFERENCES

1. Song, J., Durrin, L. K., Wilkinson, T. A., Krontiris, T. G., and Chen, Y. A. (2004) *Proc. Natl. Acad. Sci. U. S. A.* **101**, 14373-14378
2. Song, J., Zhang, Z., Hu, W., and Chen, Y. (2005) *J. Biol. Chem.* **280**, 40122-40129
3. Sekiyama, N., Ikegami, T., Yamane, T., Ikeguchi, M., Uchimura, Y., Baba, D., Ariyoshi, M., Tochio, H., Saitoh, H., and Shirakawa, M. (2008) *J. Biol. Chem.* **283**, 35966-35975
4. Johnson, P. E., Tomme, P., Joshi, M. D., and McIntosh, L. P. (1996) *Biochemistry* **35**, 13895-13906
